# Supplementary material for: Nano-Needle Boron-Doped Diamond Film with High Electrochemical Performance of Detecting Lead Ions
Source: MDPI journal article supplement (doi:10.3390/ma16216986), 2023-10-31
Supplement: s1 [file s1]

*Article*

# Nano-Needle Boron-Doped Diamond Film with High Electrochemical Performance of Detecting Lead Ions

Xiaoxi Yuan <sup>1,2</sup>, Mingchao Yang <sup>3</sup>, Xu Wang <sup>1</sup>, Yongfu Zhu <sup>1,\*</sup> and Feng Yang <sup>2,\*</sup>

<sup>1</sup> Key Laboratory of Automobile Materials, Ministry of Education, School of Materials Science and Engineering, Jilin University, Changchun 130022, China; xxyuan@jleu.edu.cn (X.Y.)

<sup>2</sup> Institute for Interdisciplinary Quantum Information Technology, Jilin Engineering Normal University, Changchun 130052, China

<sup>3</sup> Department of Physics, Hebei Normal University of Science and Technology, Qinhuangdao 066000, China; yangmc17@mails.jlu.edu.cn

\* Correspondence: yfzhu@jlu.edu.cn (Y.Z.); yangfeng@jleu.edu.cn (F.Y.)

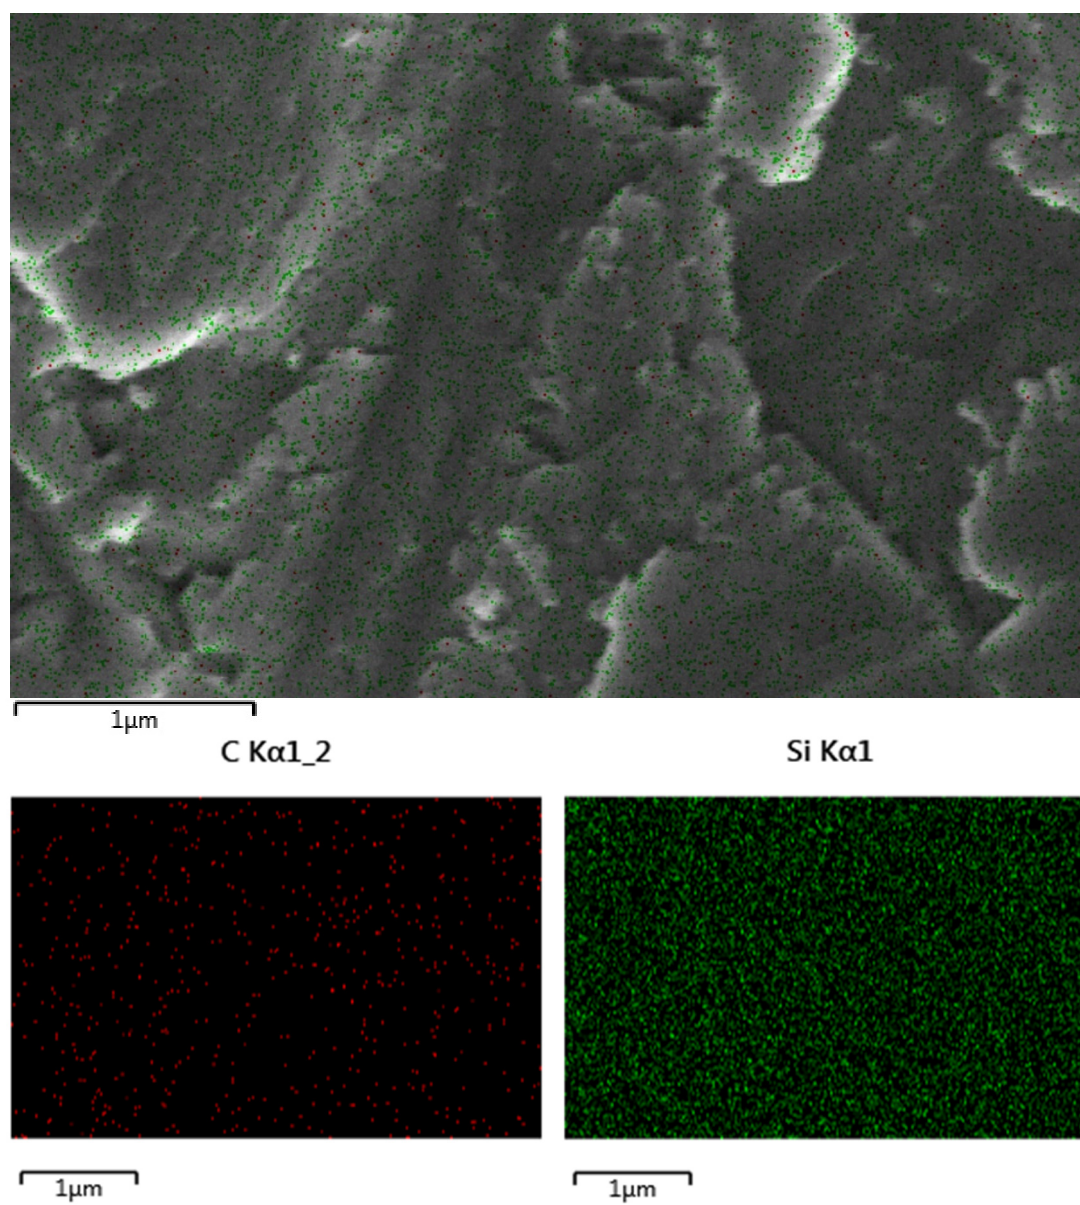

**Figure S1.** SEM and EDS images of the seeded Si substrates.

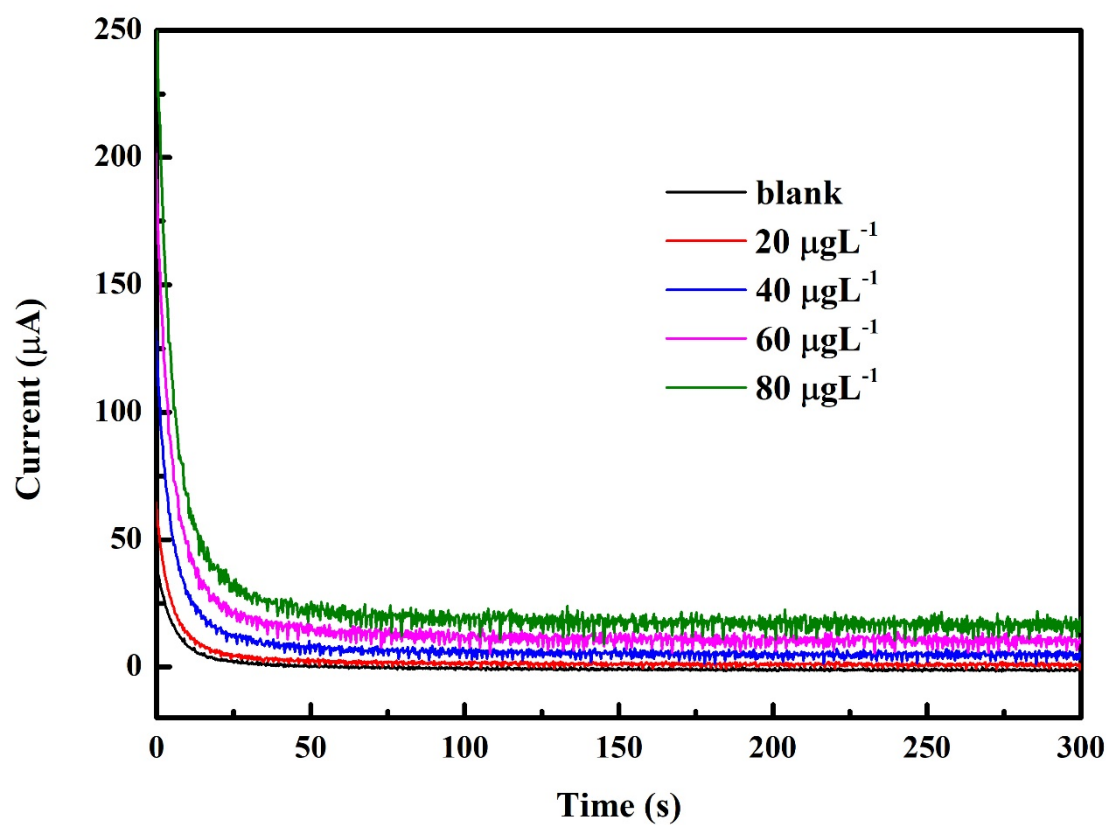

**Figure S2.** Chronoamperometry i-t curve at  $\text{Pb}^{2+}$  concentrations between 0 and  $80 \mu\text{g/L}^{-1}$ .

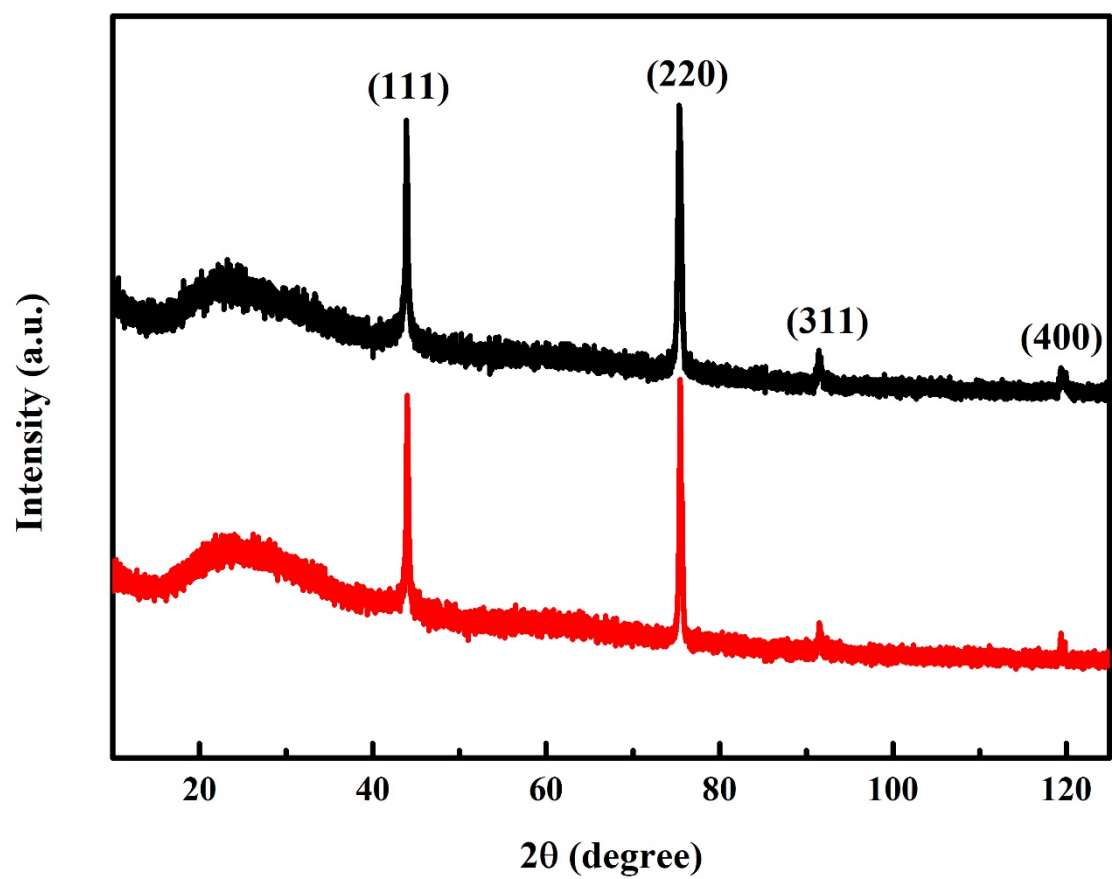

**Figure S3.** XRD of NNBDD before (black line) and after (red line) electrochemical sensing tests.
